# Supplementary material for: Availability of Outpatient Addiction Treatment and Use of Emergency Department Services Among Medicaid Enrollees
Source: Atypon-hosted journal article supplement (doi:10.1176/appi.ps.201700413), 2018-04-26
Supplement: appi.ps.201700413.ds001.pdf [file appi.ps.201700413.ds001.pdf]

**Descriptive statistics**

| <b>VARIABLE</b>                                 | <b>MEAN</b> | <b>S.E.</b> |
|-------------------------------------------------|-------------|-------------|
| <i>Enrollee-level</i>                           |             |             |
| Age (in years)                                  | 36.28       | .28         |
| Male                                            | 69.73       | .01         |
| Race/ethnicity                                  |             |             |
| % White                                         | 64.12       | .01         |
| % Black                                         | 15.72       | .01         |
| % Hispanic                                      | .73         | .01         |
| Primary admission type                          |             |             |
| % Alcohol                                       | 45.70       | .01         |
| % Opioid                                        | 5.59        | .01         |
| % Other                                         | 48.57       | .01         |
| Secondary diagnoses                             |             |             |
| % enrollees w/ chronic health condition         | 1.72        | .01         |
| % enrollees w/ psychiatric disorder             | 7.53        | .01         |
| Repeat episode                                  | 30.46       | .01         |
| <i>County-level</i>                             |             |             |
| County population (logarithm)                   | 11.91       | .02         |
| Total no. of addiction treatment programs       | 3.91        | .05         |
| County predominantly rural                      | 48.81       | .01         |
| At least one opioid treatment program in county | 59.23       | .01         |
| Two or more programs accept Medicaid            | 51.66       | .01         |
